# Supplementary material for: The increase of europium-based OLED luminance through reducing the excited state lifetime by mixed-ligand complex formation
Source: Royal Society of Chemistry journal article supplement (doi:10.1039/d3cp02082g), 2023-01-01
Supplement: d3cp02082g1.pdf [file d3cp02082g1.pdf]

## Electronic Supplementary Information

### **The increase of europium-based OLED luminance through reducing the excited state lifetime by mixed-ligand complex formation**

Makarii I. Kozlov<sup>a</sup>, Andrey A. Vashchenko<sup>b</sup>, Alexander A. Pavlov<sup>c</sup>, Alexander S. Goloveshkin<sup>c</sup>, Egor V. Latipov<sup>a</sup>, Natalia P. Kuzmina,<sup>a</sup> and Valentina V. Utochnikova<sup>a\*</sup>

<sup>a</sup> M.V. Lomonosov Moscow State University, 1/3 Leninskie Gory, Moscow, 119991, Russia

<sup>b</sup> P.N. Lebedev Physical Institute, Leninsky prosp. 53, Moscow, 119992, Russia

<sup>c</sup> A.N. Nesmeyanov Institute of Organoelement Compounds, Vavilova St. 28, Moscow, 119334, Russia

†Corresponding author:

E-mail: valentina.utochnikova@gmail.com

### Powder X-ray diffraction data

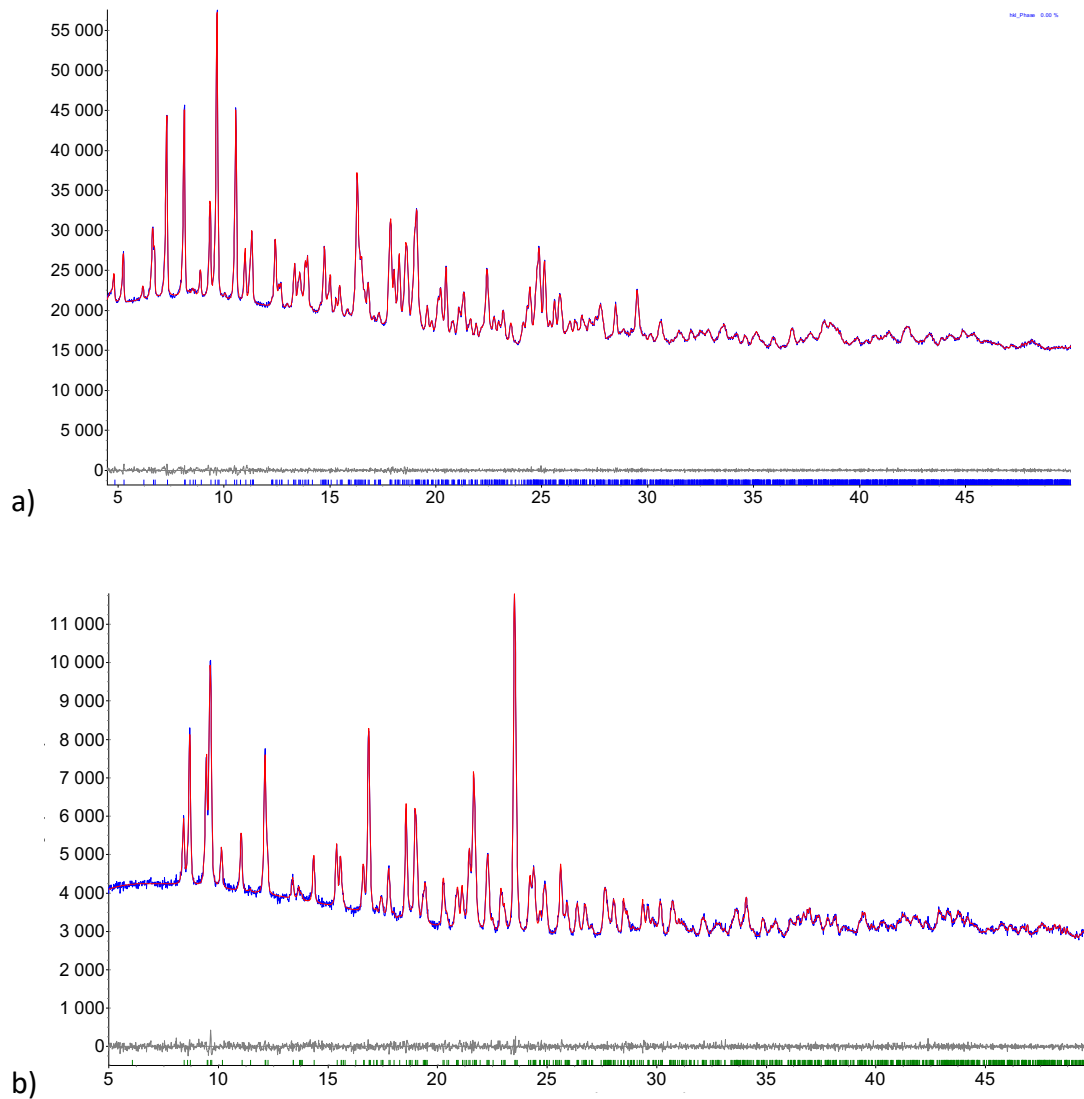

**Figure S1.** PXRD patterns of individual complexes a)  $\text{Eu}(\text{dbm})_3\text{DPPZ}$  and b)  $\text{Eu}(\text{tta})_3\text{DPPZ}$ .

|                   | Eu(dbm) <sub>3</sub> DPPZ | Eu(tta) <sub>3</sub> DPPZ |
|-------------------|---------------------------|---------------------------|
| Space group       | P21/c                     | P21/n                     |
| a, Å              | 24.224(3)                 | 10.7364(12)               |
| b, Å              | 33.348(4)                 | 20.2453(16)               |
| c, Å              | 22.019(3)                 | 21.381(2)                 |
| β, °              | 144.115(5)                | 102.038(8)                |
| V, Å <sup>3</sup> | 10426(2)                  | 4545.2(8)                 |

**The position, intensities and Miller indexes of the most intense peaks for Eu(dbm)<sub>3</sub>DPPZ**

| h | k  | l  | d        | Th2      | I    |
|---|----|----|----------|----------|------|
| 0 | 1  | 1  | 12.03762 | 7.33783  | 64.3 |
| 1 | 2  | 0  | 10.81147 | 8.17137  | 74.4 |
| 1 | 0  | 2  | 9.41249  | 9.38842  | 43.9 |
| 2 | 2  | 2  | 9.0982   | 9.71351  | 127  |
| 0 | 4  | 0  | 8.33742  | 10.60229 | 102  |
| 3 | 0  | 2  | 8.00681  | 11.0414  | 29.2 |
| 1 | 4  | 1  | 7.78335  | 11.35942 | 31   |
| 2 | 0  | 0  | 7.10043  | 12.45611 | 36.7 |
| 2 | 4  | 2  | 6.61251  | 13.37926 | 29.1 |
| 3 | 3  | 2  | 6.497    | 13.61825 | 23.2 |
| 1 | 5  | 1  | 6.3759   | 13.87817 | 28.6 |
| 3 | 1  | 1  | 6.32321  | 13.99439 | 32.9 |
| 1 | -3 | -1 | 5.98765  | 14.78292 | 41.3 |
| 2 | 3  | 3  | 5.88166  | 15.05084 | 32.1 |
| 2 | 5  | 1  | 5.7133   | 15.49704 | 23.5 |
| 4 | 0  | 4  | 5.42833  | 16.31601 | 113  |
| 1 | -4 | -1 | 5.40846  | 16.37634 | 24.3 |
| 1 | 6  | 1  | 5.38465  | 16.44925 | 25.9 |
| 4 | 1  | 4  | 5.35781  | 16.53223 | 44.5 |
| 4 | 2  | 2  | 5.25395  | 16.86142 | 25   |
| 2 | 6  | 1  | 4.96746  | 17.84158 | 54.2 |
| 2 | 6  | 2  | 4.94756  | 17.91392 | 91.9 |

|   |    |    |         |          |      |
|---|----|----|---------|----------|------|
| 3 | 5  | 3  | 4.90483 | 18.07128 | 55.4 |
| 3 | 3  | 4  | 4.84069 | 18.3128  | 75.1 |
| 1 | 6  | 2  | 4.78608 | 18.52355 | 21.3 |
| 5 | 1  | 4  | 4.7616  | 18.61962 | 73.2 |
| 2 | -1 | -1 | 4.74497 | 18.68549 | 35.8 |
| 3 | 0  | 0  | 4.73362 | 18.73068 | 31.7 |
| 3 | 1  | 0  | 4.68665 | 18.92014 | 25.3 |
| 2 | 1  | 4  | 4.66007 | 19.02902 | 64.2 |
| 1 | 7  | 1  | 4.65354 | 19.056   | 27.9 |
| 0 | 5  | 2  | 4.63809 | 19.12005 | 32.6 |
| 3 | 5  | 1  | 4.63293 | 19.14154 | 39.7 |
| 1 | 0  | -2 | 4.63012 | 19.15327 | 51.4 |
| 1 | 7  | 0  | 4.51682 | 19.63841 | 30.4 |
| 2 | -3 | -1 | 4.4019  | 20.15641 | 34.3 |
| 1 | -6 | -1 | 4.3782  | 20.26669 | 44.7 |
| 4 | 1  | 5  | 4.32359 | 20.52542 | 83.5 |
| 5 | 2  | 5  | 4.20248 | 21.1236  | 32.7 |
| 0 | 8  | 0  | 4.16871 | 21.29672 | 21.8 |
| 2 | -4 | -1 | 4.15578 | 21.36376 | 29.6 |
| 4 | 3  | 1  | 4.14959 | 21.396   | 26.9 |
| 1 | -7 | -1 | 3.95726 | 22.44905 | 46.7 |
| 2 | 7  | 0  | 3.95619 | 22.45519 | 50.2 |
| 4 | 4  | 1  | 3.9415  | 22.53998 | 25.4 |
| 3 | 7  | 1  | 3.83009 | 23.20465 | 32.7 |
| 0 | 4  | 3  | 3.82349 | 23.24524 | 22.7 |
| 6 | 3  | 4  | 3.7666  | 23.60137 | 22.5 |
| 1 | 3  | 4  | 3.68295 | 24.14537 | 23.3 |
| 1 | 9  | 1  | 3.65271 | 24.34832 | 38.5 |
| 5 | 1  | 6  | 3.6334  | 24.47973 | 86   |
| 1 | 9  | 0  | 3.58547 | 24.81217 | 35   |
| 4 | 7  | 4  | 3.58073 | 24.84554 | 37.8 |
| 5 | 2  | 6  | 3.57039 | 24.91865 | 118  |
| 6 | 2  | 6  | 3.53656 | 25.1609  | 123  |
| 1 | 4  | 4  | 3.53514 | 25.17112 | 22.8 |
| 3 | 8  | 1  | 3.49952 | 25.43163 | 27.9 |
| 5 | 3  | 6  | 3.47228 | 25.63453 | 58.5 |
| 6 | 3  | 6  | 3.44114 | 25.87052 | 46.5 |
| 0 | 10 | 0  | 3.33497 | 26.7091  | 22.4 |
| 4 | 8  | 4  | 3.30626 | 26.94539 | 21   |
| 6 | 6  | 4  | 3.2485  | 27.43375 | 22   |
| 6 | 6  | 5  | 3.23183 | 27.578   | 47.5 |

|   |     |    |         |          |      |
|---|-----|----|---------|----------|------|
| 5 | 5   | 6  | 3.2054  | 27.80996 | 33   |
| 1 | 6   | 4  | 3.19438 | 27.90784 | 25.8 |
| 6 | 1   | 7  | 3.12738 | 28.51826 | 87.5 |
| 6 | 2   | 7  | 3.08693 | 28.90006 | 20.2 |
| 6 | 7   | 4  | 3.06497 | 29.11167 | 20.5 |
| 6 | 3   | 7  | 3.02286 | 29.52637 | 61.4 |
| 3 | -6  | -1 | 3.02174 | 29.53751 | 31.1 |
| 5 | 1   | 7  | 3.02094 | 29.54551 | 40.2 |
| 1 | 11  | 0  | 2.96497 | 30.11634 | 24.3 |
| 8 | 1   | 7  | 2.91937 | 30.59813 | 20.1 |
| 2 | 9   | 4  | 2.91139 | 30.68414 | 20.1 |
| 5 | 6   | 1  | 2.90939 | 30.70576 | 24.8 |
| 1 | -11 | -1 | 2.78863 | 32.07049 | 25.1 |
| 2 | 11  | 0  | 2.78825 | 32.07491 | 20.6 |
| 7 | 0   | 8  | 2.75155 | 32.51455 | 24.8 |
| 8 | 2   | 8  | 2.67891 | 33.4217  | 25.5 |
| 6 | 2   | 8  | 2.65435 | 33.74013 | 22.4 |
| 2 | 13  | 2  | 2.49661 | 35.94228 | 24.2 |
| 6 | 0   | 0  | 2.36681 | 37.98669 | 21.2 |
| 7 | 3   | 9  | 2.35486 | 38.18691 | 37.3 |
| 4 | 13  | 2  | 2.32759 | 38.65198 | 20.1 |
| 2 | 14  | 2  | 2.32677 | 38.66615 | 31.6 |
| 5 | 6   | 8  | 2.31325 | 38.90116 | 24.6 |
| 2 | -11 | -2 | 2.30636 | 39.02211 | 40.2 |
| 8 | 9   | 7  | 2.29862 | 39.15881 | 44.5 |

**The position, intensities and Miller indexes of the most intense peaks for Eu(tta)<sub>3</sub>DPPZ**

| h | k  | l  | m | d        | Th2      | I    |
|---|----|----|---|----------|----------|------|
| 0 | 2  | 0  | 2 | 10.12375 | 8.7275   | 23.3 |
| 1 | 1  | 0  | 4 | 9.32145  | 9.48033  | 19.5 |
| 1 | -1 | -1 | 4 | 9.16888  | 9.63846  | 24.9 |
| 0 | 2  | 1  | 4 | 9.1123   | 9.69845  | 24.4 |
| 1 | 1  | 1  | 4 | 7.9821   | 11.07569 | 11.3 |
| 0 | 2  | 2  | 4 | 7.27354  | 12.15852 | 26.3 |
| 1 | -1 | -3 | 4 | 6.15632  | 14.37573 | 12.5 |
| 0 | 2  | 3  | 4 | 5.7417   | 15.41994 | 17.8 |
| 1 | 3  | 0  | 4 | 5.67752  | 15.59532 | 13.5 |
| 2 | 0  | 0  | 2 | 5.25019  | 16.87356 | 34.7 |
| 1 | -3 | -2 | 4 | 5.24374  | 16.89447 | 23.1 |

|   |    |    |   |         |          |      |
|---|----|----|---|---------|----------|------|
| 2 | -1 | -2 | 4 | 4.98367 | 17.78308 | 13.2 |
| 1 | 3  | 2  | 4 | 4.76905 | 18.5903  | 43.2 |
| 1 | -3 | -3 | 4 | 4.66765 | 18.99786 | 31.2 |
| 0 | 2  | 4  | 4 | 4.64553 | 19.08913 | 17.8 |
| 0 | 4  | 2  | 4 | 4.55615 | 19.46725 | 11.3 |
| 1 | 4  | 1  | 4 | 4.37336 | 20.28931 | 19.9 |
| 1 | 1  | 4  | 4 | 4.23755 | 20.9468  | 14.5 |
| 2 | -3 | -1 | 4 | 4.19894 | 21.14162 | 16.6 |
| 2 | 3  | 0  | 4 | 4.144   | 21.42519 | 11.8 |
| 0 | 3  | 4  | 4 | 4.13331 | 21.48125 | 25.9 |
| 1 | -1 | -5 | 4 | 4.11119 | 21.59823 | 12   |
| 0 | 1  | 5  | 4 | 4.09631 | 21.67763 | 18.9 |
| 0 | 4  | 3  | 4 | 4.09601 | 21.67924 | 47.4 |
| 2 | -1 | -4 | 4 | 4.07917 | 21.76983 | 15.6 |
| 2 | 2  | 2  | 4 | 3.99105 | 22.25658 | 14.7 |
| 0 | 5  | 1  | 4 | 3.97566 | 22.34383 | 20.8 |
| 1 | -2 | -5 | 4 | 3.87834 | 22.91203 | 19.7 |
| 1 | 5  | 0  | 4 | 3.77827 | 23.52741 | 26.8 |
| 0 | 5  | 2  | 4 | 3.77624 | 23.54025 | 154  |
| 2 | 1  | 3  | 4 | 3.76104 | 23.63674 | 19.4 |
| 1 | 5  | 1  | 4 | 3.67019 | 24.23057 | 12.9 |
| 1 | 4  | 3  | 4 | 3.66682 | 24.25323 | 15.8 |
| 1 | 3  | 4  | 4 | 3.64655 | 24.39009 | 10.4 |
| 2 | 4  | 0  | 4 | 3.64404 | 24.40712 | 20   |
| 1 | 0  | 5  | 2 | 3.63393 | 24.47607 | 10.4 |
| 3 | 0  | -1 | 2 | 3.5757  | 24.88101 | 14.9 |
| 1 | -3 | -5 | 4 | 3.56509 | 24.95626 | 17.4 |
| 1 | 5  | 2  | 4 | 3.47113 | 25.64313 | 40.4 |
| 0 | 6  | 1  | 4 | 3.33149 | 26.73746 | 14.2 |
| 0 | 4  | 5  | 4 | 3.22439 | 27.64292 | 15.3 |
| 1 | -5 | -4 | 4 | 3.17771 | 28.05722 | 15.4 |
| 1 | -6 | -2 | 4 | 3.12763 | 28.51592 | 25.1 |
| 2 | 5  | 1  | 4 | 3.11066 | 28.67481 | 14.5 |
| 0 | 6  | 3  | 4 | 3.03743 | 29.3815  | 26   |
| 2 | 3  | 4  | 4 | 3.01495 | 29.60561 | 10.5 |
| 3 | 3  | 1  | 4 | 2.99387 | 29.81881 | 10.7 |
| 1 | 5  | 4  | 4 | 2.95875 | 30.1812  | 15.5 |
| 0 | 5  | 5  | 4 | 2.90942 | 30.70543 | 12.7 |
| 2 | -5 | -4 | 4 | 2.90326 | 30.7722  | 11.3 |
| 3 | 4  | 0  | 4 | 2.87891 | 31.03896 | 12.2 |
| 0 | 7  | 3  | 4 | 2.67166 | 33.51502 | 11.7 |

|   |    |    |   |         |          |      |
|---|----|----|---|---------|----------|------|
| 1 | 4  | 6  | 4 | 2.65557 | 33.72419 | 12.9 |
| 2 | 1  | 6  | 4 | 2.63685 | 33.97082 | 12.4 |
| 0 | 6  | 5  | 4 | 2.62641 | 34.11004 | 37   |
| 3 | 0  | 5  | 2 | 2.44497 | 36.72818 | 15.8 |
| 1 | -5 | -7 | 4 | 2.43413 | 36.89766 | 16.3 |
| 0 | 6  | 6  | 4 | 2.42451 | 37.04928 | 16.3 |
| 4 | 1  | 2  | 4 | 2.41193 | 37.24973 | 14.1 |
| 2 | 7  | 2  | 4 | 2.40739 | 37.32253 | 11.1 |
| 2 | 1  | 7  | 4 | 2.3746  | 37.85728 | 12.6 |
| 1 | 2  | 8  | 4 | 2.35475 | 38.18871 | 12   |
| 4 | -4 | -4 | 4 | 2.29222 | 39.27268 | 15.8 |
| 4 | -2 | -6 | 4 | 2.28471 | 39.40715 | 21.4 |
| 3 | -4 | -7 | 4 | 2.27755 | 39.53605 | 10.9 |
| 1 | -6 | -7 | 4 | 2.26103 | 39.83723 | 15.4 |

## TGA data and IR-spectroscopy

The TGA data of individual complexes ( $\text{Eu}(\text{dbm})_3\text{DPPZ}$  and  $\text{Eu}(\text{tta})_3\text{DPPZ}\cdot\text{EtOH}$ ) and mixed-ligand complex  $\text{Eu}(\text{dbm}+\text{tta})_3\text{DPPZ}$  (Fig. S2 a) correspond to typical decomposition of  $\beta$ -diketonate with phenanthroline derivatives. In the first stage of decomposition of  $\text{Eu}(\text{tta})_3\text{DPPZ}\cdot\text{EtOH}$ , in the range of 120–130°C molecule of EtOH is eliminated, which showed the presence of coordinated molecule.

In the spectra of  $\text{Eu}(\text{dbm})_3\text{DPPZ}$ ,  $\text{Eu}(\text{tta})_3\text{DPPZ}\cdot\text{EtOH}$ , and  $\text{Eu}(\text{dbm}+\text{tta})_3\text{DPPZ}$  (Fig. S2 b) low intensity bands at 3100–2800  $\text{cm}^{-1}$  are observed, corresponding to the aromatic C–H vibrations of DPPZ and anionic ligands, bands at 1600–1500  $\text{cm}^{-1}$  and 700–600  $\text{cm}^{-1}$ , corresponding to C=O vibrations of  $\beta$ -diketonate.

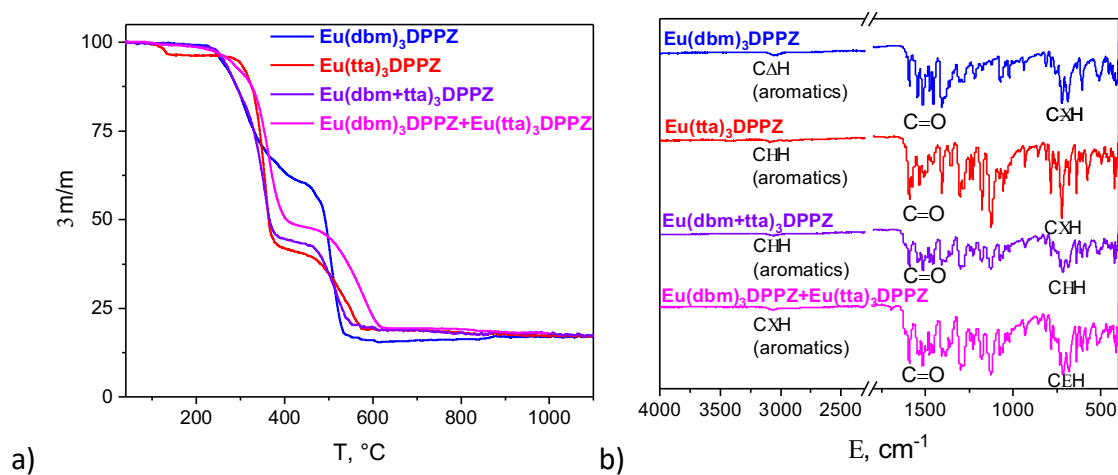

**Figure S2.** a) TGA curve of individual complexes ( $\text{Eu}(\text{dbm})_3\text{DPPZ}$  and  $\text{Eu}(\text{tta})_3\text{DPPZ}\cdot\text{EtOH}$ ) and mixed-ligand complex  $\text{Eu}(\text{dbm}+\text{tta})_3\text{DPPZ}$ . b) IR-spectrum of individual complexes ( $\text{Eu}(\text{dbm})_3\text{DPPZ}$  and  $\text{Eu}(\text{tta})_3\text{DPPZ}\cdot\text{EtOH}$ ) and mixed-ligand complexes  $\text{Eu}(\text{dbm}+\text{tta})_3\text{DPPZ}$  and [ $\text{Eu}(\text{dbm})_3\text{DPPZ} + \text{Eu}(\text{tta})_3\text{DPPZ}$ ].



## NMR spectroscopy

$^1\text{H}$  and  $^{19}\text{F}$  NMR spectroscopy were also measured in  $\text{DMSO-d}_6$  solvent.

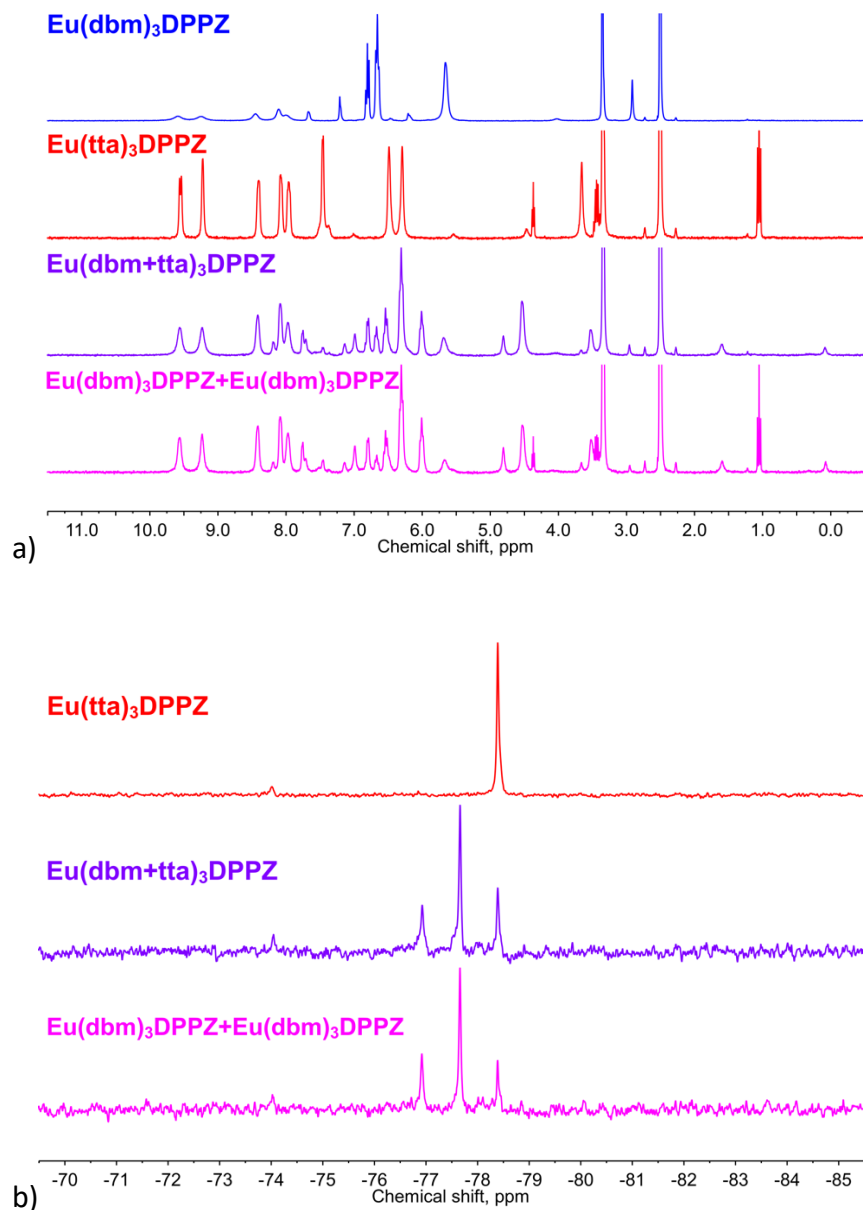

**Figure S3.** a)  $^1\text{H}$  NMR spectra of individual complexes  $\text{Eu}(\text{dbm})_3\text{DPPZ}$  and  $\text{Eu}(\text{tta})_3\text{DPPZ}$  and mixed-ligand complexes  $\text{Eu}(\text{dbm}+\text{tta})_3\text{DPPZ}$  and  $[\text{Eu}(\text{dbm})_3\text{DPPZ} + \text{Eu}(\text{tta})_3\text{DPPZ}]$ . b)  $^{19}\text{F}$  NMR spectra of individual complex  $\text{Eu}(\text{tta})_3\text{DPPZ}$  and mixed-ligand complex  $\text{Eu}(\text{dbm}+\text{tta})_3\text{DPPZ}$  ( $\text{DMSO-d}_6$ ).
